# Supplementary material for: Granular Creep and Its Role in Optimizing Solid Electrolyte Fabrication for Solid-State Batteries
Source: Research Square preprint supplement (doi:10.21203/rs.3.rs-6248382/v1), 2025-04-03
Supplement: Supplementary file 1 [file 3bab696a2d40452130426541.pdf]

## **Granular Creep and Its Role in Optimizing Solid Electrolyte Fabrication for Solid-State Batteries**

Joseph M. Vazquez Mercado<sup>1†</sup>, Fernando D. Cúñez<sup>1\*†</sup>, Alhamdu Nuhu Bage<sup>1</sup>, Fengyu Shen<sup>2</sup>,

Dula Parkinson<sup>2</sup>, Michael C. Tucker<sup>2</sup>, Qingsong Howard Tu<sup>1\*</sup>

1. Department of Mechanical Engineering, Rochester Institute of Technology, Rochester,  
14623, New York, USA.

2. Energy Storage and Distributed Resources, Lawrence Berkeley National Laboratory,  
Berkeley, 94720, California, USA.

†The authors contributed equally

\*Corresponding authors: Qingsong Howard Tu (Email: [howard.tu@rit.edu](mailto:howard.tu@rit.edu)),  
Fernando David Cúñez (Email: [fdceme@rit.edu](mailto:fdceme@rit.edu))

Lead contact: Qingsong Howard Tu (Email: [howard.tu@rit.edu](mailto:howard.tu@rit.edu))

## Supplementary Information

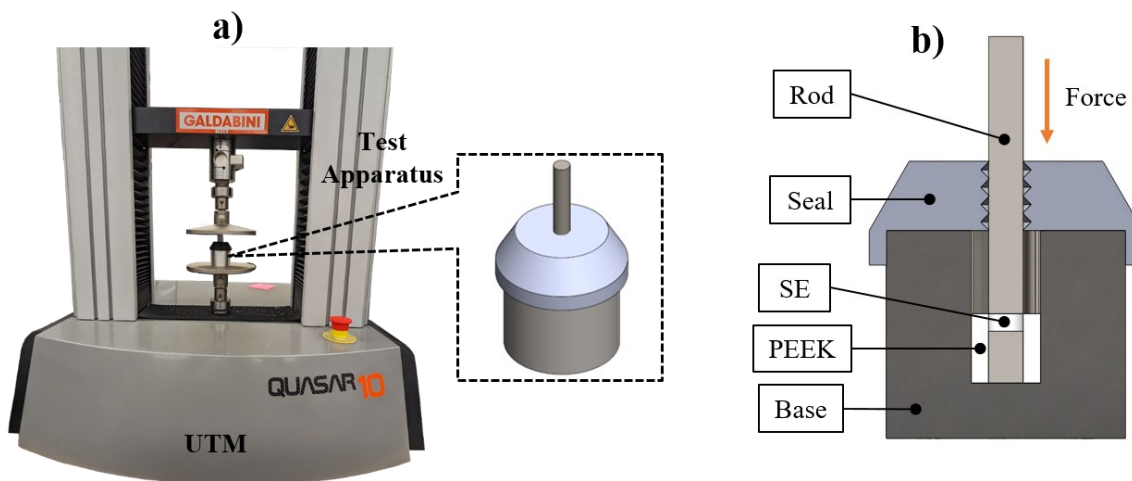

**SI Figure 1.** Solid Electrolyte preconditioning testing setup. a) Picture of UTM with testing apparatus. b) Labeled schematic of testing apparatus.

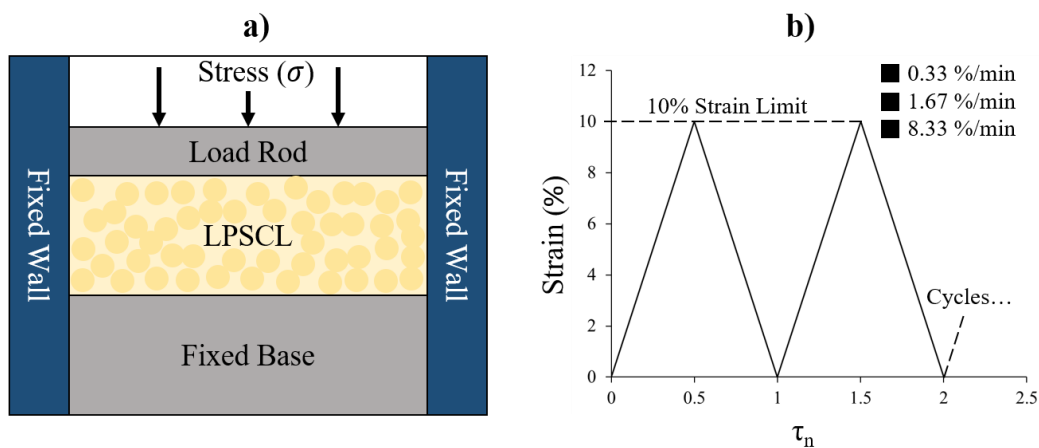

**SI Figure 2.** a) Schematic of LPSCl pellet configuration during mechanical loading preconditioning. b) Varying strain rates provided by UTM mechanical loading, where is  $\tau_n$  normalized time.

## Support Information

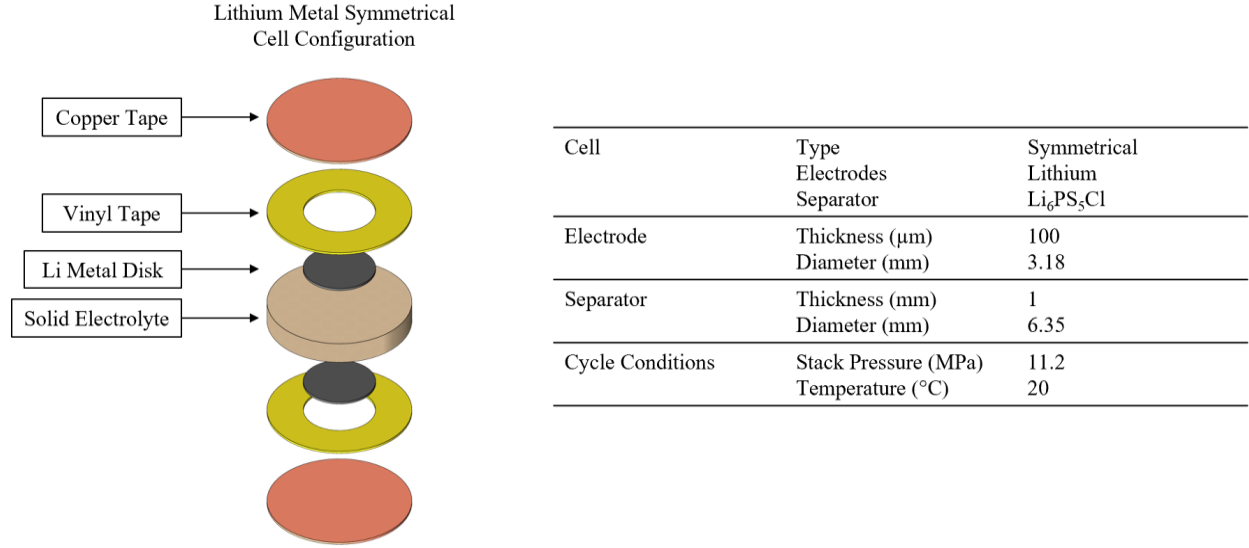

**SI Figure 3.** Lithium metal symmetrical cell configuration schematic and relevant parameters table.

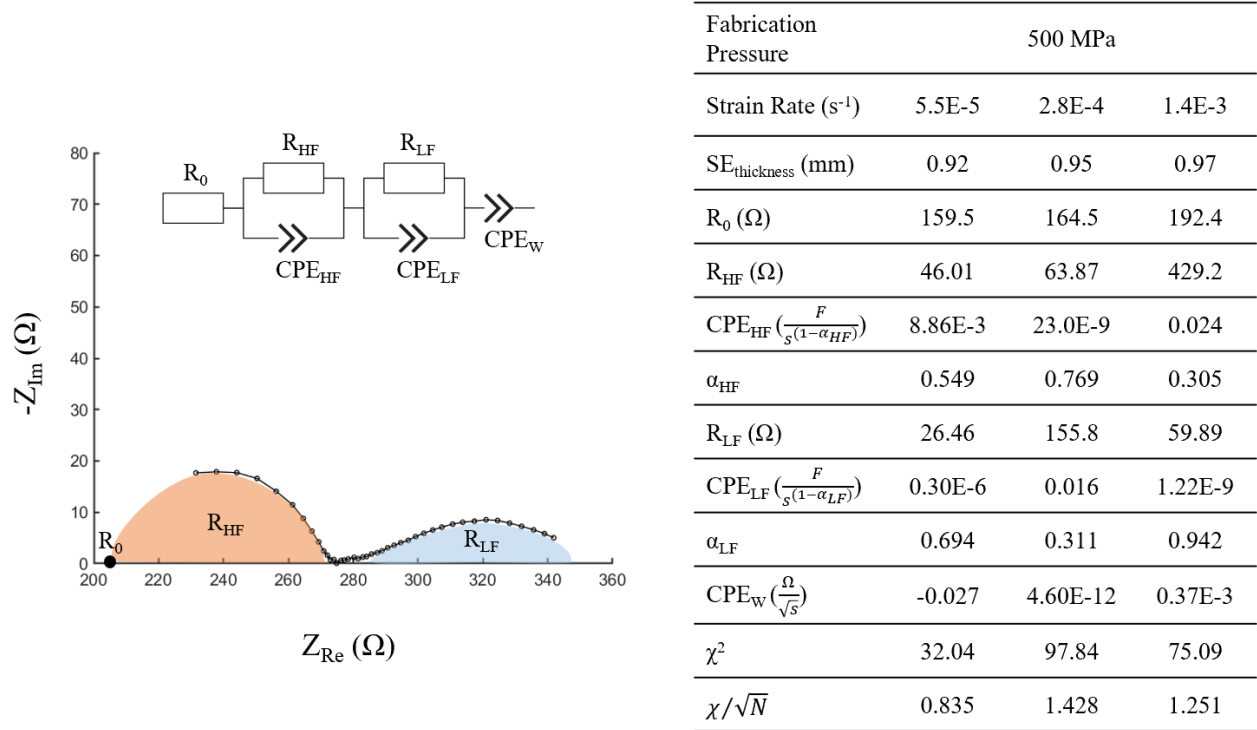

**SI Figure 4.** Equivalent circuit model and analysis table for EIS analysis.

## Support Information

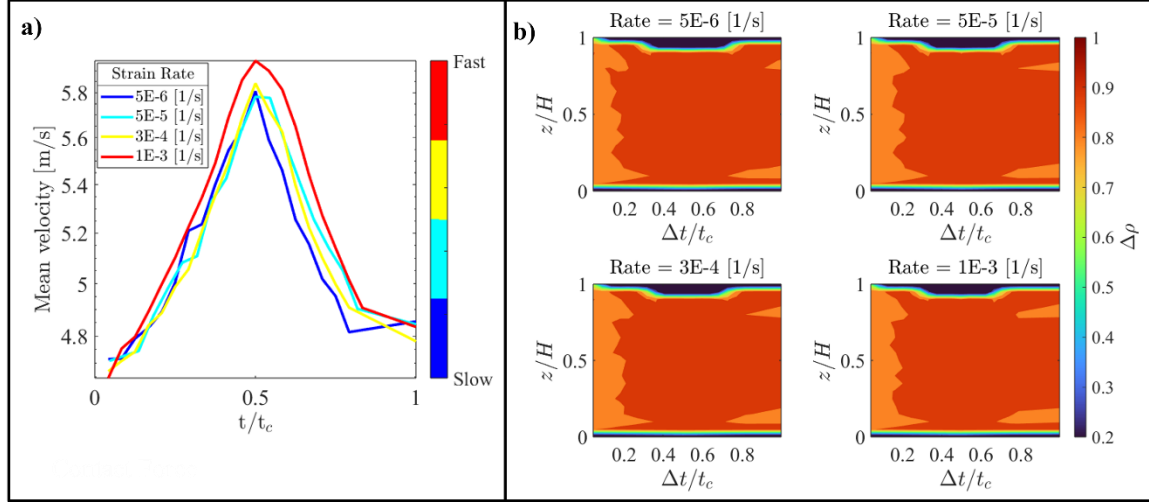

**SI Figure 5.** Compression and decompression states for different strain rates at high cohesive surface energy; (a) Spatial average velocity of the grains as a function of time; and (c) Temporal evolution of the packing fraction for different strain rates.

**Table 1.** Simulation Parameters

| Description                                 | Units           | SE (LPSCl)        |
|---------------------------------------------|-----------------|-------------------|
| Young's Modulus (E)                         | GPa             | 22.1 <sup>1</sup> |
| Poisson's ratio ( $\nu$ )                   |                 | 0.3 <sup>1</sup>  |
| Density ( $\rho$ )                          | $\text{g/cm}^3$ | 1.64 <sup>2</sup> |
| Coefficient of Friction ( $\mu$ )           |                 | 0.1*              |
| Coefficient of Rolling Friction ( $\mu_r$ ) |                 | 0.1*              |
| Coefficient of Restitution (e)              |                 | 0.1*              |
| Cohesion Energy Density (k)                 | $\text{J/m}^3$  | 1E+5*             |

[1] Fukunishi, G., Tabuchi, M., Ikezawa, A., Okajima, T., Kitamura, F., Suzuki, K., ... & Arai, H. (2023). AC impedance analysis of NCM523 composite electrodes in all-solid-state three electrode cells and their degradation behavior. *Journal of Power Sources*, 564, 232864.

[2] [Lithium phosphorus sulfur chloride \(LPSCl\) powder battery grade | Sigma-Aldrich](#)

[\*] Numerical values obtained from benchmark tests comparing stress strain curves from experiments
